# Supplementary material for: Measurement Invariance Widely Holds for the Yale-Brown Obsessive Compulsive Scale
Source: Atypon-hosted journal article supplement (doi:10.1027/1015-5759/a000788), 2023-09-20
Supplement: 1015-5759_a000788_esm1.pdf [file 1015-5759_a000788_esm1.pdf]

**Supplements**

Table E1  
*Fits of configural MI models*

| Covariate       | Scale               | $\chi^2$ | <i>df</i> | <i>p</i> | CFI   | RMSEA | LB <sub>RMSEA</sub> | SRMR  |
|-----------------|---------------------|----------|-----------|----------|-------|-------|---------------------|-------|
| Time            | Fatori et al., 2020 | 296.16   | 82        | <.001    | 0.982 | 0.079 | 0.070               | 0.048 |
| Time            | modified Kim model  | 389.32   | 133       | <.001    | 0.980 | 0.068 | 0.060               | 0.044 |
| Time            | Aggr. Impulses      | 49.19    | 47        | 0.385    | 0.999 | 0.011 | <.001               | 0.069 |
| Time            | Cleanliness         | 661.83   | 237       | <.001    | 0.963 | 0.068 | 0.062               | 0.095 |
| Time            | Keeping Order       | 16.13    | 15        | 0.374    | 0.999 | 0.014 | <.001               | 0.046 |
| Time            | Mag. Thinking       | 86.42    | 47        | <.001    | 0.982 | 0.046 | 0.030               | 0.096 |
| Time            | Mental Exactness    | 3.35     | 5         | 0.646    | 1.000 | <.001 | <.001               | 0.022 |
| Time            | Mental Urges        | 54.27    | 27        | 0.001    | 0.977 | 0.050 | 0.031               | 0.077 |
| Time            | Pure Rep.           | 42.42    | 47        | 0.662    | 1.000 | <.001 | <.001               | 0.055 |
| Time            | Responsibility      | 229.12   | 91        | <.001    | 0.955 | 0.063 | 0.053               | 0.099 |
| Time            | Sex Obsessions      | 4.71     | 5         | 0.452    | 1.000 | <.001 | <.001               | 0.026 |
| Time            | Somatic Obs.        | 7.73     | 5         | 0.172    | 0.996 | 0.037 | <.001               | 0.036 |
| Anxiety         | Fatori et al., 2020 | 181.84   | 30        | <.001    | 0.974 | 0.098 | 0.084               | 0.044 |
| Anxiety         | modified Kim model  | 190.28   | 52        | <.001    | 0.980 | 0.071 | 0.060               | 0.036 |
| Anxiety         | Aggr. Impulses      | 21.61    | 18        | 0.250    | 0.998 | 0.019 | <.001               | 0.052 |
| Anxiety         | Cleanliness         | 479.20   | 106       | <.001    | 0.974 | 0.081 | 0.074               | 0.077 |
| Anxiety         | Keeping Order       | 8.22     | 4         | 0.084    | 0.994 | 0.045 | <.001               | 0.037 |
| Anxiety         | Mag. Thinking       | 67.67    | 18        | <.001    | 0.986 | 0.072 | 0.054               | 0.064 |
| Anxiety         | Mental Urges        | 12.50    | 8         | 0.130    | 0.990 | 0.033 | <.001               | 0.035 |
| Anxiety         | Pure Rep.           | 30.57    | 18        | 0.032    | 0.991 | 0.036 | 0.011               | 0.049 |
| Anxiety         | Responsibility      | 129.40   | 36        | <.001    | 0.976 | 0.070 | 0.057               | 0.073 |
| Anxiety         | Sex./Som./Ment. Ex. | 105.05   | 48        | <.001    | 0.981 | 0.047 | 0.035               | 0.077 |
| Depression curr | Fatori et al., 2020 | 142.75   | 30        | <.001    | 0.978 | 0.084 | 0.070               | 0.040 |
| Depression curr | modified Kim model  | 180.66   | 52        | <.001    | 0.980 | 0.068 | 0.058               | 0.036 |
| Depression curr | Aggr. Impulses      | 24.65    | 18        | 0.135    | 0.996 | 0.026 | <.001               | 0.060 |
| Depression curr | Cleanliness         | 487.16   | 106       | <.001    | 0.973 | 0.082 | 0.075               | 0.078 |
| Depression curr | Keeping Order       | 8.85     | 4         | 0.065    | 0.993 | 0.048 | <.001               | 0.037 |
| Depression curr | Mag. Thinking       | 70.28    | 18        | <.001    | 0.986 | 0.074 | 0.056               | 0.067 |
| Depression curr | Mental Urges        | 7.72     | 8         | 0.461    | 1.000 | <.001 | <.001               | 0.029 |
| Depression curr | Pure Rep.           | 26.73    | 18        | 0.084    | 0.994 | 0.030 | <.001               | 0.046 |
| Depression curr | Responsibility      | 149.35   | 36        | <.001    | 0.969 | 0.077 | 0.064               | 0.084 |
| Depression curr | Sex./Som./Ment. Ex. | 118.49   | 48        | <.001    | 0.975 | 0.053 | 0.041               | 0.085 |
| Depression life | Fatori et al., 2020 | 165.75   | 30        | <.001    | 0.975 | 0.092 | 0.079               | 0.042 |
| Depression life | modified Kim model  | 188.14   | 52        | <.001    | 0.979 | 0.070 | 0.060               | 0.036 |
| Depression life | Aggr. Impulses      | 16.87    | 18        | 0.532    | 1.000 | <.001 | <.001               | 0.055 |
| Depression life | Cleanliness         | 483.76   | 106       | <.001    | 0.974 | 0.082 | 0.075               | 0.077 |
| Depression life | Keeping Order       | 10.89    | 4         | 0.028    | 0.990 | 0.057 | 0.017               | 0.035 |
| Depression life | Mag. Thinking       | 80.50    | 18        | <.001    | 0.983 | 0.081 | 0.063               | 0.074 |
| Depression life | Mental Urges        | 11.35    | 8         | 0.183    | 0.992 | 0.028 | <.001               | 0.036 |

| Covariate       | Scale               | $\chi^2$ | <i>df</i> | <i>p</i> | CFI   | RMSEA | LB <sub>RMSEA</sub> | SRMR  |
|-----------------|---------------------|----------|-----------|----------|-------|-------|---------------------|-------|
| Depression life | Pure Rep.           | 25.82    | 18        | 0.104    | 0.994 | 0.029 | <.001               | 0.047 |
| Depression life | Responsibility      | 130.00   | 36        | <.001    | 0.975 | 0.070 | 0.057               | 0.072 |
| Depression life | Sex./Som./Ment. Ex. | 106.01   | 48        | <.001    | 0.980 | 0.048 | 0.035               | 0.081 |
| OCPD            | Fatori et al., 2020 | 115.81   | 30        | <.001    | 0.986 | 0.073 | 0.059               | 0.040 |
| OCPD            | modified Kim model  | 134.91   | 52        | <.001    | 0.988 | 0.055 | 0.044               | 0.033 |
| OCPD            | Aggr. Impulses      | 15.37    | 18        | 0.637    | 1.000 | <.001 | <.001               | 0.054 |
| OCPD            | Cleanliness         | 404.91   | 106       | <.001    | 0.979 | 0.073 | 0.065               | 0.077 |
| OCPD            | Keeping Order       | 9.88     | 4         | 0.042    | 0.991 | 0.053 | 0.009               | 0.041 |
| OCPD            | Mag. Thinking       | 65.79    | 18        | <.001    | 0.985 | 0.071 | 0.053               | 0.061 |
| OCPD            | Mental Urges        | 6.88     | 8         | 0.550    | 1.000 | <.001 | <.001               | 0.030 |
| OCPD            | Pure Rep.           | 30.16    | 18        | 0.036    | 0.991 | 0.036 | 0.009               | 0.045 |
| OCPD            | Responsibility      | 104.85   | 36        | <.001    | 0.979 | 0.060 | 0.047               | 0.071 |
| OCPD            | Sex./Som./Ment. Ex. | 106.11   | 48        | <.001    | 0.977 | 0.048 | 0.035               | 0.080 |
| prev. treatment | Fatori et al., 2020 | 120.30   | 30        | <.001    | 0.984 | 0.077 | 0.063               | 0.040 |
| prev. treatment | modified Kim model  | 147.18   | 52        | <.001    | 0.986 | 0.060 | 0.049               | 0.034 |
| prev. treatment | Aggr. Impulses      | 21.34    | 18        | 0.263    | 0.997 | 0.019 | <.001               | 0.070 |
| prev. treatment | Cleanliness         | 471.13   | 106       | <.001    | 0.974 | 0.082 | 0.075               | 0.078 |
| prev. treatment | Keeping Order       | 7.49     | 4         | 0.112    | 0.995 | 0.041 | <.001               | 0.035 |
| prev. treatment | Mag. Thinking       | 57.30    | 18        | <.001    | 0.987 | 0.065 | 0.047               | 0.065 |
| prev. treatment | Mental Urges        | 11.44    | 8         | 0.178    | 0.992 | 0.029 | <.001               | 0.045 |
| prev. treatment | Pure Rep.           | 22.30    | 18        | 0.219    | 0.996 | 0.022 | <.001               | 0.041 |
| prev. treatment | Responsibility      | 126.03   | 36        | <.001    | 0.974 | 0.070 | 0.057               | 0.075 |
| prev. treatment | Sex./Som./Ment. Ex. | 105.47   | 48        | <.001    | 0.981 | 0.048 | 0.036               | 0.084 |
| Motivation      | Fatori et al., 2020 | 164.04   | 30        | <.001    | 0.970 | 0.099 | 0.084               | 0.046 |
| Motivation      | modified Kim model  | 146.03   | 52        | <.001    | 0.983 | 0.063 | 0.051               | 0.033 |
| Motivation      | Aggr. Impulses      | 27.58    | 18        | 0.069    | 0.993 | 0.034 | <.001               | 0.083 |
| Motivation      | Cleanliness         | 393.10   | 106       | <.001    | 0.978 | 0.077 | 0.069               | 0.079 |
| Motivation      | Keeping Order       | 10.22    | 4         | 0.037    | 0.990 | 0.058 | 0.013               | 0.043 |
| Motivation      | Mag. Thinking       | 55.71    | 18        | <.001    | 0.986 | 0.068 | 0.048               | 0.063 |
| Motivation      | Mental Urges        | 7.64     | 8         | 0.469    | 1.000 | <.001 | <.001               | 0.035 |
| Motivation      | Pure Rep.           | 27.39    | 18        | 0.072    | 0.992 | 0.034 | <.001               | 0.049 |
| Motivation      | Responsibility      | 110.31   | 36        | <.001    | 0.976 | 0.067 | 0.053               | 0.075 |
| Motivation      | Sex./Som./Ment. Ex. | 102.39   | 48        | <.001    | 0.978 | 0.050 | 0.036               | 0.087 |
| Gender          | Fatori et al., 2020 | 173.53   | 30        | <.001    | 0.973 | 0.096 | 0.083               | 0.044 |
| Gender          | modified Kim model  | 199.97   | 52        | <.001    | 0.977 | 0.074 | 0.063               | 0.037 |
| Gender          | Aggr. Impulses      | 19.52    | 18        | 0.361    | 0.999 | 0.013 | <.001               | 0.058 |
| Gender          | Cleanliness         | 491.42   | 106       | <.001    | 0.973 | 0.084 | 0.076               | 0.080 |
| Gender          | Keeping Order       | 7.82     | 4         | 0.098    | 0.994 | 0.043 | <.001               | 0.037 |
| Gender          | Mag. Thinking       | 69.21    | 18        | <.001    | 0.986 | 0.074 | 0.056               | 0.061 |
| Gender          | Mental Urges        | 6.38     | 8         | 0.604    | 1.000 | <.001 | <.001               | 0.032 |
| Gender          | Pure Rep.           | 21.69    | 18        | 0.246    | 0.997 | 0.020 | <.001               | 0.042 |
| Gender          | Responsibility      | 117.76   | 36        | <.001    | 0.977 | 0.066 | 0.053               | 0.070 |
| Gender          | Sex./Som./Ment. Ex. | 110.89   | 48        | <.001    | 0.980 | 0.050 | 0.038               | 0.084 |
| Migration       | Fatori et al., 2020 | 162.92   | 30        | <.001    | 0.971 | 0.099 | 0.084               | 0.047 |

| Covariate | Scale               | $\chi^2$ | <i>df</i> | <i>p</i> | CFI   | RMSEA | LB <sub>RMSEA</sub> | SRMR  |
|-----------|---------------------|----------|-----------|----------|-------|-------|---------------------|-------|
| Migration | modified Kim model  | 183.69   | 52        | <.001    | 0.976 | 0.075 | 0.063               | 0.040 |
| Migration | Aggr. Impulses      | 29.55    | 18        | 0.042    | 0.990 | 0.038 | 0.007               | 0.077 |
| Migration | Cleanliness         | 429.24   | 106       | <.001    | 0.972 | 0.082 | 0.074               | 0.080 |
| Migration | Keeping Order       | 12.26    | 4         | 0.016    | 0.989 | 0.068 | 0.026               | 0.040 |
| Migration | Mag. Thinking       | 47.76    | 18        | <.001    | 0.989 | 0.060 | 0.040               | 0.061 |
| Migration | Mental Urges        | 8.95     | 8         | 0.347    | 0.997 | 0.016 | <.001               | 0.039 |
| Migration | Pure Rep.           | 31.14    | 18        | 0.028    | 0.988 | 0.040 | 0.013               | 0.057 |
| Migration | Responsibility      | 126.89   | 36        | <.001    | 0.972 | 0.075 | 0.061               | 0.078 |
| Migration | Sex./Som./Ment. Ex. | 106.61   | 48        | <.001    | 0.979 | 0.052 | 0.039               | 0.083 |

Table E2  
*Fit differences of configural v. strong MI models*

| Covariate       | Scale               | $\Delta\chi^2$ | $\Delta df$ | $p$   | $\Delta CFI$ | $\Delta RMSEA$ | $\Delta SRMR$ |
|-----------------|---------------------|----------------|-------------|-------|--------------|----------------|---------------|
| Time            | Fatori et al., 2020 | 118.02         | 28          | <.001 | 0.006        | 0.000          | -0.001        |
| Time            | modified Kim model  | 138.00         | 38          | <.001 | 0.006        | 0.000          | -0.001        |
| Time            | Aggr. Impulses      | 1.46           | 4           | 0.835 | -0.001       | 0.008          | -0.001        |
| Time            | Cleanliness         | 13.67          | 10          | 0.189 | 0.001        | 0.001          | 0.000         |
| Time            | Keeping Order       | 1.93           | 2           | 0.381 | 0.001        | -0.006         | -0.002        |
| Time            | Mag. Thinking       | 5.24           | 4           | 0.263 | 0.001        | 0.000          | -0.001        |
| Time            | Mental Exactness    | 0.13           | 1           | 0.714 | 0.000        | 0.000          | 0.000         |
| Time            | Mental Urges        | 1.46           | 3           | 0.691 | -0.002       | 0.005          | -0.001        |
| Time            | Pure Rep.           | 1.31           | 4           | 0.860 | 0.001        | 0.000          | -0.001        |
| Time            | Responsibility      | 4.16           | 6           | 0.655 | 0.000        | 0.002          | 0.000         |
| Time            | Sex Obsessions      | 1.62           | 1           | 0.204 | 0.001        | -0.030         | -0.001        |
| Time            | Somatic Obsessions  | 0.27           | 1           | 0.605 | -0.001       | 0.009          | 0.000         |
| Anxiety         | Fatori et al., 2020 | 35.33          | 28          | 0.161 | 0.000        | 0.028          | -0.001        |
| Anxiety         | modified Kim model  | 49.25          | 38          | 0.104 | 0.000        | 0.017          | -0.003        |
| Anxiety         | Aggr. Impulses      | 7.01           | 4           | 0.135 | 0.005        | -0.011         | -0.023        |
| Anxiety         | Cleanliness         | 13.15          | 10          | 0.215 | 0.000        | 0.003          | 0.000         |
| Anxiety         | Keeping Order       | 8.08           | 2           | 0.018 | 0.011        | -0.017         | -0.004        |
| Anxiety         | Mag. Thinking       | 2.97           | 4           | 0.563 | -0.001       | 0.008          | -0.001        |
| Anxiety         | Mental Urges        | 3.64           | 3           | 0.303 | 0.002        | 0.002          | -0.005        |
| Anxiety         | Pure Rep.           | 2.08           | 4           | 0.722 | -0.004       | 0.012          | -0.001        |
| Anxiety         | Responsibility      | 9.38           | 6           | 0.153 | 0.001        | 0.004          | -0.001        |
| Anxiety         | Sex./Som./Ment. Ex. | 7.96           | 3           | 0.047 | 0.002        | -0.001         | -0.001        |
| Depression curr | Fatori et al., 2020 | 39.49          | 28          | 0.073 | 0.002        | 0.021          | -0.002        |
| Depression curr | modified Kim model  | 43.76          | 38          | 0.240 | -0.001       | 0.017          | -0.002        |
| Depression curr | Aggr. Impulses      | 4.11           | 4           | 0.392 | 0.000        | 0.003          | -0.011        |
| Depression curr | Cleanliness         | 4.42           | 10          | 0.926 | 0.000        | 0.004          | 0.000         |
| Depression curr | Keeping Order       | 4.13           | 2           | 0.127 | 0.005        | -0.003         | -0.001        |
| Depression curr | Mag. Thinking       | 2.68           | 4           | 0.613 | -0.001       | 0.009          | 0.000         |
| Depression curr | Mental Urges        | 5.71           | 3           | 0.127 | 0.010        | -0.027         | -0.011        |
| Depression curr | Pure Rep.           | 8.07           | 4           | 0.089 | 0.006        | -0.008         | -0.010        |
| Depression curr | Responsibility      | 8.25           | 6           | 0.220 | 0.001        | 0.005          | 0.000         |
| Depression curr | Sex./Som./Ment. Ex. | 0.90           | 3           | 0.826 | 0.000        | 0.002          | 0.001         |
| Depression life | Fatori et al., 2020 | 40.81          | 28          | 0.056 | 0.002        | 0.023          | 0.000         |
| Depression life | modified Kim model  | 59.31          | 38          | 0.015 | 0.003        | 0.013          | -0.001        |
| Depression life | Aggr. Impulses      | 2.54           | 4           | 0.638 | 0.000        | 0.000          | -0.001        |
| Depression life | Cleanliness         | 5.93           | 10          | 0.821 | 0.000        | 0.004          | 0.000         |
| Depression life | Keeping Order       | 4.68           | 2           | 0.096 | 0.005        | -0.001         | -0.006        |
| Depression life | Mag. Thinking       | 2.42           | 4           | 0.660 | -0.001       | 0.010          | -0.002        |
| Depression life | Mental Urges        | 1.93           | 3           | 0.586 | -0.004       | 0.012          | -0.003        |
| Depression life | Pure Rep.           | 5.88           | 4           | 0.209 | 0.002        | -0.002         | -0.007        |
| Depression life | Responsibility      | 12.55          | 6           | 0.051 | 0.002        | 0.002          | -0.001        |

| Covariate       | Scale               | $\Delta\chi^2$ | $\Delta df$ | $p$   | $\Delta CFI$ | $\Delta RMSEA$ | $\Delta SRMR$ |
|-----------------|---------------------|----------------|-------------|-------|--------------|----------------|---------------|
| Depression life | Sex./Som./Ment. Ex. | 0.39           | 3           | 0.942 | -0.001       | 0.002          | 0.000         |
| OCPD            | Fatori et al., 2020 | 32.58          | 28          | 0.251 | 0.001        | 0.019          | -0.001        |
| OCPD            | modified Kim model  | 43.15          | 38          | 0.261 | 0.000        | 0.014          | -0.001        |
| OCPD            | Aggr. Impulses      | 3.78           | 4           | 0.437 | 0.000        | 0.000          | -0.001        |
| OCPD            | Cleanliness         | 10.56          | 10          | 0.393 | -0.001       | 0.004          | 0.000         |
| OCPD            | Keeping Order       | 1.77           | 2           | 0.413 | -0.002       | 0.014          | 0.000         |
| OCPD            | Mag. Thinking       | 3.82           | 4           | 0.430 | -0.003       | 0.013          | -0.001        |
| OCPD            | Mental Urges        | 2.98           | 3           | 0.395 | 0.000        | 0.000          | -0.003        |
| OCPD            | Pure Rep.           | 4.25           | 4           | 0.374 | -0.001       | 0.004          | -0.002        |
| OCPD            | Responsibility      | 8.41           | 6           | 0.209 | 0.003        | 0.001          | -0.002        |
| OCPD            | Sex./Som./Ment. Ex. | 3.22           | 3           | 0.359 | 0.000        | 0.001          | 0.000         |
| prev. treatment | Fatori et al., 2020 | 34.94          | 28          | 0.172 | 0.001        | 0.020          | -0.001        |
| prev. treatment | modified Kim model  | 46.71          | 38          | 0.157 | 0.001        | 0.013          | -0.003        |
| prev. treatment | Aggr. Impulses      | 2.83           | 4           | 0.586 | -0.003       | 0.019          | 0.000         |
| prev. treatment | Cleanliness         | 8.42           | 10          | 0.588 | 0.000        | 0.004          | 0.000         |
| prev. treatment | Keeping Order       | 2.16           | 2           | 0.340 | 0.000        | 0.007          | -0.004        |
| prev. treatment | Mag. Thinking       | 4.39           | 4           | 0.356 | -0.002       | 0.011          | -0.002        |
| prev. treatment | Mental Urges        | 1.92           | 3           | 0.589 | -0.007       | 0.019          | -0.001        |
| prev. treatment | Pure Rep.           | 3.14           | 4           | 0.535 | -0.003       | 0.012          | -0.001        |
| prev. treatment | Responsibility      | 10.34          | 6           | 0.111 | 0.002        | 0.002          | -0.002        |
| prev. treatment | Sex./Som./Ment. Ex. | 3.44           | 3           | 0.328 | 0.000        | 0.002          | -0.001        |
| Motivation      | Fatori et al., 2020 | 38.35          | 28          | 0.092 | 0.001        | 0.026          | -0.001        |
| Motivation      | modified Kim model  | 51.42          | 38          | 0.072 | 0.004        | 0.010          | -0.002        |
| Motivation      | Aggr. Impulses      | 4.12           | 4           | 0.390 | -0.001       | 0.006          | -0.002        |
| Motivation      | Cleanliness         | 11.23          | 10          | 0.340 | 0.000        | 0.004          | 0.000         |
| Motivation      | Keeping Order       | 1.87           | 2           | 0.392 | -0.001       | 0.014          | -0.001        |
| Motivation      | Mag. Thinking       | 4.32           | 4           | 0.365 | -0.003       | 0.013          | -0.002        |
| Motivation      | Mental Urges        | 4.49           | 3           | 0.213 | 0.013        | -0.031         | -0.007        |
| Motivation      | Pure Rep.           | 3.03           | 4           | 0.552 | -0.004       | 0.011          | 0.000         |
| Motivation      | Responsibility      | 5.17           | 6           | 0.522 | -0.002       | 0.007          | 0.000         |
| Motivation      | Sex./Som./Ment. Ex. | 4.84           | 3           | 0.184 | 0.001        | 0.001          | 0.000         |
| Gender          | Fatori et al., 2020 | 23.17          | 28          | 0.724 | -0.003       | 0.030          | -0.001        |
| Gender          | modified Kim model  | 35.24          | 38          | 0.598 | -0.003       | 0.021          | -0.001        |
| Gender          | Aggr. Impulses      | 2.07           | 4           | 0.723 | -0.001       | 0.013          | -0.001        |
| Gender          | Cleanliness         | 25.47          | 10          | 0.005 | 0.001        | 0.002          | -0.001        |
| Gender          | Keeping Order       | 0.72           | 2           | 0.698 | -0.003       | 0.017          | 0.000         |
| Gender          | Mag. Thinking       | 3.02           | 4           | 0.555 | -0.001       | 0.008          | 0.000         |
| Gender          | Mental Urges        | 3.20           | 3           | 0.361 | 0.000        | 0.000          | -0.005        |
| Gender          | Pure Rep.           | 0.67           | 4           | 0.955 | -0.003       | 0.020          | -0.001        |
| Gender          | Responsibility      | 7.58           | 6           | 0.271 | 0.000        | 0.005          | -0.001        |
| Gender          | Sex./Som./Ment. Ex. | 9.71           | 3           | 0.021 | 0.002        | -0.001         | -0.002        |
| Migration       | Fatori et al., 2020 | 40.78          | 28          | 0.056 | 0.001        | 0.026          | 0.000         |
| Migration       | modified Kim model  | 47.99          | 38          | 0.129 | -0.001       | 0.019          | -0.001        |
| Migration       | Aggr. Impulses      | 6.57           | 4           | 0.161 | 0.005        | -0.004         | -0.010        |

| Covariate | Scale               | $\Delta\chi^2$ | $\Delta df$ | $p$   | $\Delta CFI$ | $\Delta RMSEA$ | $\Delta SRMR$ |
|-----------|---------------------|----------------|-------------|-------|--------------|----------------|---------------|
| Migration | Cleanliness         | 7.39           | 10          | 0.688 | -0.001       | 0.005          | 0.000         |
| Migration | Keeping Order       | 1.89           | 2           | 0.388 | -0.001       | 0.015          | -0.001        |
| Migration | Mag. Thinking       | 7.61           | 4           | 0.107 | 0.002        | 0.000          | -0.002        |
| Migration | Mental Urges        | 5.24           | 3           | 0.155 | 0.016        | -0.018         | -0.008        |
| Migration | Pure Rep.           | 2.02           | 4           | 0.733 | -0.004       | 0.011          | 0.000         |
| Migration | Responsibility      | 11.17          | 6           | 0.083 | 0.003        | 0.002          | -0.001        |
| Migration | Sex./Som./Ment. Ex. | 2.27           | 3           | 0.519 | 0.000        | 0.002          | -0.001        |

Table E3

*Fit differences of configural v strong MI models for metric covariates*

| Covariate    | Scale               | $\Delta\chi^2$ | $\Delta df$ | $p$   | $\Delta AIC$ | $\Delta BIC$ | $\Delta aBIC$ |
|--------------|---------------------|----------------|-------------|-------|--------------|--------------|---------------|
| BDI-II       | Fatori et al., 2020 | 46.88          | 12          | <.001 | -13.5        | 45.7         | 7.6           |
| BDI-II       | modified Kim model  | 45.32          | 14          | <.001 | -10.2        | 58.8         | 14.3          |
| BDI-II       | Aggr. Impulses      | 56.70          | 10          | <.001 | -29.4        | 19.9         | -11.8         |
| BDI-II       | Cleanliness         | 33.41          | 22          | 0.056 | 10.7         | 119.2        | 49.3          |
| BDI-II       | Keeping Order       | 39.60          | 6           | <.001 | -25.9        | 3.7          | -15.4         |
| BDI-II       | Mag. Thinking       | 12.41          | 10          | 0.259 | 8.1          | 57.4         | 25.7          |
| BDI-II       | Mental Urges        | 20.84          | 8           | 0.008 | -6.4         | 33.0         | 7.6           |
| BDI-II       | Pure Rep.           | 30.39          | 10          | 0.001 | -6.3         | 43.0         | 11.3          |
| BDI-II       | Responsibility      | 36.07          | 14          | 0.001 | -7.9         | 61.1         | 16.7          |
| BDI-II       | Sex./Som./Ment. Ex. | 56.34          | 12          | <.001 | -25.2        | 34.0         | -4.1          |
| MADRS        | Fatori et al., 2020 | 39.54          | 12          | <.001 | -12.4        | 47.2         | 9.0           |
| MADRS        | modified Kim model  | 30.79          | 14          | 0.006 | 0.9          | 70.4         | 25.9          |
| MADRS        | Aggr. Impulses      | 34.27          | 10          | <.001 | -12.4        | 37.2         | 5.5           |
| MADRS        | Cleanliness         | 21.75          | 22          | 0.475 | 21.8         | 131.1        | 61.2          |
| MADRS        | Keeping Order       | 16.51          | 6           | 0.011 | -4.6         | 25.2         | 6.1           |
| MADRS        | Mag. Thinking       | 3.76           | 10          | 0.957 | 15.3         | 64.9         | 33.2          |
| MADRS        | Mental Urges        | 15.23          | 8           | 0.055 | 1.3          | 41.0         | 15.6          |
| MADRS        | Pure Rep.           | 27.62          | 10          | 0.002 | -9.0         | 40.7         | 8.9           |
| MADRS        | Responsibility      | 33.02          | 14          | 0.003 | -4.7         | 64.8         | 20.3          |
| MADRS        | Sex./Som./Ment. Ex. | 20.23          | 12          | 0.063 | 6.3          | 65.9         | 27.8          |
| BSI          | Fatori et al., 2020 | 52.24          | 12          | <.001 | -21.3        | 38.3         | 0.2           |
| BSI          | modified Kim model  | 43.43          | 14          | <.001 | -10.2        | 59.3         | 14.8          |
| BSI          | Aggr. Impulses      | 67.42          | 10          | <.001 | -37.3        | 12.4         | -19.4         |
| BSI          | Cleanliness         | 50.58          | 22          | <.001 | -7.9         | 101.3        | 31.4          |
| BSI          | Keeping Order       | 60.84          | 6           | <.001 | -45.3        | -15.5        | -34.6         |
| BSI          | Mag. Thinking       | 9.69           | 10          | 0.468 | 9.9          | 59.6         | 27.8          |
| BSI          | Mental Urges        | 15.27          | 8           | 0.054 | -2.1         | 37.7         | 12.3          |
| BSI          | Pure Rep.           | 32.63          | 10          | <.001 | -12.1        | 37.6         | 5.8           |
| BSI          | Responsibility      | 54.84          | 14          | <.001 | -26.9        | 42.7         | -1.8          |
| BSI          | Sex./Som./Ment. Ex. | 77.68          | 12          | <.001 | -30.5        | 29.1         | -9.1          |
| GAF          | Fatori et al., 2020 | 124.00         | 12          | <.001 | -89.1        | -30.0        | -68.1         |
| GAF          | modified Kim model  | 128.45         | 14          | <.001 | -84.0        | -15.1        | -59.6         |
| GAF          | Aggr. Impulses      | 38.10          | 10          | <.001 | -14.0        | 35.2         | 3.5           |
| GAF          | Cleanliness         | 30.13          | 22          | 0.115 | 14.1         | 122.4        | 52.6          |
| GAF          | Keeping Order       | 2.24           | 6           | 0.896 | 9.8          | 39.4         | 20.3          |
| GAF          | Mag. Thinking       | 14.12          | 10          | 0.168 | 5.0          | 54.2         | 22.5          |
| GAF          | Mental Urges        | 10.97          | 8           | 0.204 | 5.6          | 45.0         | 19.6          |
| GAF          | Pure Rep.           | 32.60          | 10          | <.001 | -9.4         | 39.9         | 8.1           |
| GAF          | Responsibility      | 16.69          | 14          | 0.273 | 12.7         | 81.6         | 37.2          |
| GAF          | Sex./Som./Ment. Ex. | 31.50          | 12          | 0.002 | 8.1          | 67.2         | 29.1          |
| Age at onset | Fatori et al., 2020 | 40.86          | 12          | <.001 | -11.7        | 47.6         | 9.4           |

| Covariate         | Scale               | $\Delta\chi^2$ | $\Delta df$ | $p$   | $\Delta AIC$ | $\Delta BIC$ | $\Delta aBIC$ |
|-------------------|---------------------|----------------|-------------|-------|--------------|--------------|---------------|
| Age at onset      | modified Kim model  | 62.56          | 14          | <.001 | -23.4        | 45.7         | 1.2           |
| Age at onset      | Aggr. Impulses      | 17.29          | 10          | 0.068 | 2.0          | 51.3         | 19.5          |
| Age at onset      | Cleanliness         | 38.39          | 22          | 0.017 | 3.7          | 112.3        | 42.4          |
| Age at onset      | Keeping Order       | 4.58           | 6           | 0.598 | 7.3          | 36.9         | 17.8          |
| Age at onset      | Mag. Thinking       | 15.87          | 10          | 0.104 | 3.1          | 52.5         | 20.7          |
| Age at onset      | Mental Urges        | 5.30           | 8           | 0.725 | 9.2          | 48.7         | 23.3          |
| Age at onset      | Pure Rep.           | 19.31          | 10          | 0.036 | -0.5         | 48.9         | 17.1          |
| Age at onset      | Responsibility      | 41.42          | 14          | <.001 | -15.5        | 53.6         | 9.1           |
| Age at onset      | Sex./Som./Ment. Ex. | 20.30          | 12          | 0.062 | 3.7          | 63.0         | 24.8          |
| Years since onset | Fatori et al., 2020 | 14.34          | 12          | 0.279 | 13.4         | 72.1         | 34.0          |
| Years since onset | modified Kim model  | 12.77          | 14          | 0.544 | 17.9         | 86.5         | 42.0          |
| Years since onset | Aggr. Impulses      | 3.76           | 10          | 0.958 | 16.9         | 65.9         | 34.1          |
| Years since onset | Cleanliness         | 28.25          | 22          | 0.167 | 15.3         | 123.1        | 53.2          |
| Years since onset | Keeping Order       | 9.51           | 6           | 0.147 | 1.6          | 31.0         | 12.0          |
| Years since onset | Mag. Thinking       | 11.69          | 10          | 0.307 | 8.4          | 57.4         | 25.6          |
| Years since onset | Mental Urges        | 12.99          | 8           | 0.112 | 3.2          | 42.4         | 16.9          |
| Years since onset | Pure Rep.           | 7.21           | 10          | 0.706 | 13.7         | 62.7         | 30.9          |
| Years since onset | Responsibility      | 22.98          | 14          | 0.061 | 5.8          | 74.3         | 29.9          |
| Years since onset | Sex./Som./Ment. Ex. | 15.01          | 12          | 0.241 | 13.8         | 72.5         | 34.4          |
| Age               | Fatori et al., 2020 | 63.49          | 12          | <.001 | -27.3        | 32.0         | -6.1          |
| Age               | modified Kim model  | 48.63          | 14          | <.001 | -11.6        | 57.6         | 13.1          |
| Age               | Aggr. Impulses      | 16.64          | 10          | 0.083 | 2.5          | 51.9         | 20.1          |
| Age               | Cleanliness         | 51.24          | 22          | <.001 | -10.3        | 98.4         | 28.5          |
| Age               | Keeping Order       | 8.86           | 6           | 0.182 | 3.1          | 32.7         | 13.6          |
| Age               | Mag. Thinking       | 30.86          | 10          | 0.001 | -13.3        | 36.1         | 4.4           |
| Age               | Mental Urges        | 14.67          | 8           | 0.066 | 0.7          | 40.2         | 14.8          |
| Age               | Pure Rep.           | 28.05          | 10          | 0.002 | -6.3         | 43.1         | 11.3          |
| Age               | Responsibility      | 52.54          | 14          | <.001 | -26.3        | 42.8         | -1.6          |
| Age               | Sex./Som./Ment. Ex. | 43.60          | 12          | <.001 | -0.7         | 58.5         | 20.4          |
| SES               | Fatori et al., 2020 | 39.39          | 12          | <.001 | -9.6         | 49.3         | 11.2          |
| SES               | modified Kim model  | 36.37          | 14          | 0.001 | -3.3         | 65.4         | 21.0          |
| SES               | Aggr. Impulses      | 32.22          | 10          | <.001 | -13.8        | 35.3         | 3.5           |
| SES               | Cleanliness         | 48.29          | 22          | 0.001 | -8.2         | 99.9         | 30.0          |
| SES               | Keeping Order       | 7.81           | 6           | 0.252 | 3.8          | 33.3         | 14.2          |
| SES               | Mag. Thinking       | 13.70          | 10          | 0.187 | 4.1          | 53.2         | 21.4          |
| SES               | Mental Urges        | 7.61           | 8           | 0.473 | 8.4          | 47.6         | 22.2          |
| SES               | Pure Rep.           | 7.07           | 10          | 0.719 | 13.1         | 62.2         | 30.4          |
| SES               | Responsibility      | 31.51          | 14          | 0.005 | -8.1         | 60.7         | 16.2          |
| SES               | Sex./Som./Ment. Ex. | 24.59          | 12          | 0.017 | 3.8          | 62.7         | 24.6          |



Table E4

*Factors and items of the Y-BOCS symptom checklist according to the model by Schulze et al. (2018)*

|                                                                                                |                                                                         |
|------------------------------------------------------------------------------------------------|-------------------------------------------------------------------------|
| <b>Aggressive Impulses</b>                                                                     | <b>Cleanliness</b>                                                      |
| Fear might harm self                                                                           | Concerns with bodily waste or secretions                                |
| Fear might harm others                                                                         | Concerns with germs or dirt                                             |
| Violent or horrific images                                                                     | Excessive concerns with envir. contaminants                             |
| Fear of blurting out obscenities or insults                                                    | Excessive concern with household items                                  |
| Fear will act on unwanted impulse                                                              | Excessive concern with animals                                          |
| Fear will steal things                                                                         | Bothered by sticky substances or residues                               |
| <b>Sexual Obsessions</b>                                                                       | Concerned will get ill because of contaminant                           |
| Forbidden or perverse sexual thoughts, images, or impulses                                     | Concerned will get others ill by spreading contaminant                  |
| Content involves children or incest                                                            | Excessive or ritualized hand washing                                    |
| Aggressive sexual behavior towards others                                                      | Excessive or ritualized showering, bathing, tooth brushing, or grooming |
| <b>Responsibility</b>                                                                          | Involves cleaning of household items, inanimate objects                 |
| Fear will harm others because not careful enough                                               | Other measures to prevent or remove contact with contaminants           |
| Fear will be responsible for something else terrible happening                                 | <b>Somatic Obsessions</b>                                               |
| Checking locks, stoves, appliances, etc.                                                       | Concern with illness or disease                                         |
| Checking that did not/will not harm others                                                     | Excessive concern with body parts or aspect of appearance               |
| Checking that did not/will not harm self                                                       | Checking tied to somatic obsessions                                     |
| Checking that nothing terrible did/will happen                                                 | <b>Mental Urges</b>                                                     |
| Checking that did not make mistake                                                             | Need to know or remember                                                |
| Measures (other than checking) to prevent: harm to self, harm to others, terrible consequences | Intrusive (nonviolent) images                                           |
| <b>Keeping Order</b>                                                                           | Intrusive nonsense sounds, words, or music                              |
| Hoarding/saving obsessions                                                                     | Mental rituals (other)                                                  |
| Obsessions with need for symmetry or exactness, not with magical thinking                      | Need to tell, ask, or confess                                           |
| Fear of losing things                                                                          | <b>Pure Repetitions</b>                                                 |
| Ordering/arranging compulsions                                                                 | Re-reading or re-writing                                                |
| Hoarding/Collecting Compulsions                                                                | Need to repeat routine activities                                       |
| Excessive listmaking                                                                           | Counting compulsions                                                    |
| <b>Magical Thinking</b>                                                                        | Need to touch, tap or rub                                               |
| Concerned with sacrilege and blasphemy                                                         | Rituals involving blinking or staring                                   |
| Obsessions with need for symmetry or exactness, with magical thinking                          | Ritualized eating behaviors                                             |
| Lucky/unlucky numbers                                                                          | <b>Morality</b>                                                         |
| Colors with special significance                                                               | Excess concern with right/wrong, morality                               |
| Superstitious fears                                                                            | Fear of saying certain things                                           |
| Superstitious behaviors                                                                        | Fear of not saying just the right thing                                 |
